# Supplementary material for: Convergent Genomic Signatures of High-Altitude Adaptation among Six Independently Evolved Mammals
Source: MDPI journal article supplement (doi:10.3390/ani12243572), 2022-12-16
Supplement: s1 [file s1]

**Table S1.** Genome accession number and gene number used for gene family clustering in each species.

| Species                          | NCBI accession number | Unclustered | Single copy | Multiple copy | Others | Total |
|----------------------------------|-----------------------|-------------|-------------|---------------|--------|-------|
| <i>Bos mutus</i>                 | GCF_000298355.1       | 282         | 8751        | 2246          | 8325   | 25630 |
| <i>Bos taurus</i>                | GCF_002263795.1       | 422         | 8799        | 2193          | 9240   | 26700 |
| <i>Bubalus bubalis</i>           | GCF_019923935.1       | 508         | 8678        | 2552          | 9193   | 26986 |
| <i>Canis lupus familiaris</i>    | GCF_014441545.1       | 733         | 8647        | 2555          | 8526   | 26537 |
| <i>Capra hircus</i>              | GCF_001704415.1       | 287         | 8793        | 2219          | 8816   | 26148 |
| <i>Ochotona curzoniae</i>        | GCF_017591425.1       | 282         | 8282        | 3405          | 8352   | 26733 |
| <i>Oryctolagus cuniculus</i>     | GCF_000003625.3       | 731         | 8814        | 2100          | 6349   | 24265 |
| <i>Ovis aries</i> (high)         | GCA_017524585.1       | 1403        | 8538        | 2834          | 7506   | 26485 |
| <i>Ovis aries</i> (low)          | GCF_016772045.1       | 338         | 8556        | 2918          | 9011   | 26860 |
| <i>Pantholops hodgsonii</i>      | GCF_000400835.1       | 450         | 8604        | 2646          | 8373   | 30828 |
| <i>Ptilocolobus tephrosceles</i> | GCF_002776525.3       | 1293        | 8422        | 3178          | 8848   | 29378 |
| <i>Rhinopithecus bieti</i>       | GCF_001698545.1       | 867         | 8593        | 2636          | 8142   | 26301 |
| <i>Trachypithecus francoisi</i>  | GCF_009764315.1       | 623         | 8477        | 3255          | 8659   | 27098 |
| <i>Vulpes lagopus</i>            | GCF_018345385.1       | 696         | 8572        | 2842          | 8214   | 26353 |
| <i>Vulpes ferrilata</i>          | GCA_024500485.1       | 2653        | 8497        | 3073          | 6907   | 27369 |

**Table S2.** The number of significantly expanded gene families enriched in different GO terms of each species.

| GO term    | <i>B. mutus</i> | <i>P. hodgsonii</i> | <i>O. aries</i> | <i>V. ferrilata</i> | <i>R. bieti</i> | <i>O. curzoniae</i> |
|------------|-----------------|---------------------|-----------------|---------------------|-----------------|---------------------|
| GO:0003676 | 7               | 1                   | 37              | 30                  | 12              | 15                  |
| GO:0003735 | 12              | 117                 | 64              | 37                  | 9               | 9                   |
| GO:0004930 | 309             | 26                  | 124             | 4                   | 38              | 230                 |
| GO:0005509 | 27              | 17                  | 3               | 15                  | 14              | 34                  |
| GO:0005515 | 3               | 9                   | 35              | 51                  | 26              | 67                  |
| GO:0005576 | 18              | 12                  | 26              | 20                  | 3               | 21                  |
| GO:0005634 | 4               | 4                   | 32              | 23                  | 11              | 23                  |
| GO:0005840 | 12              | 111                 | 64              | 37                  | 9               | 9                   |
| GO:0006355 | 7               | 13                  | 8               | 15                  | 57              | 51                  |
| GO:0006412 | 12              | 117                 | 64              | 37                  | 9               | 9                   |
| GO:0007186 | 324             | 39                  | 135             | 4                   | 42              | 264                 |
| GO:0016020 | 27              | 26                  | 19              | 13                  | 26              | 40                  |
| GO:0016021 | 327             | 45                  | 169             | 10                  | 43              | 264                 |
| GO:0046982 | 44              | 17                  | 12              | 8                   | 2               | 61                  |
| GO:0003677 | 44              | 31                  | 19              | 12                  | 3               | 80                  |
| GO:0007156 | 25              | 12                  | 3               | 12                  | 11              | 34                  |
| GO:0000786 | 27              | 17                  | 0               | 1                   | 2               | 61                  |
| GO:0003723 | 13              | 0                   | 35              | 43                  | 2               | 12                  |
| GO:0003924 | 5               | 34                  | 19              | 25                  | 0               | 14                  |
| GO:0004984 | 321             | 28                  | 128             | 0                   | 382             | 205                 |
| GO:0005198 | 1               | 0                   | 12              | 10                  | 3               | 3                   |
| GO:0005525 | 19              | 37                  | 52              | 37                  | 0               | 14                  |
| GO:0006457 | 2               | 12                  | 9               | 3                   | 0               | 3                   |
| GO:0006508 | 4               | 7                   | 1               | 0                   | 11              | 32                  |
| GO:0008270 | 1               | 8                   | 6               | 0                   | 18              | 14                  |
| GO:0003824 | 0               | 66                  | 8               | 47                  | 3               | 4                   |
| GO:0005524 | 0               | 21                  | 29              | 30                  | 2               | 22                  |
| GO:0006749 | 0               | 1                   | 4               | 17                  | 4               | 15                  |
| GO:0016887 | 0               | 7                   | 5               | 30                  | 2               | 12                  |

**Table S3.** The number of significantly contracted gene families enriched in different GO terms of each species.

|            | <i>B. Mutus</i> | <i>P. hodgsonii</i> | <i>O. aries</i> | <i>V. ferrilata</i> | <i>R. bieti</i> | <i>O. curzoniae</i> |
|------------|-----------------|---------------------|-----------------|---------------------|-----------------|---------------------|
| GO:0004984 | 130             | 239                 | 117             | 27                  | 16              | 26                  |
| GO:0005525 | 6               | 13                  | 8               | 10                  | 9               | 1                   |
| GO:0005515 | 6               | 11                  | 12              | 1                   | 8               | 3                   |
| GO:0020037 | 5               | 16                  | 12              | 3                   | 7               | 1                   |
| GO:0005634 | 7               | 3                   | 5               | 8                   | 5               | 2                   |
| GO:0004930 | 139             | 236                 | 104             | 19                  | 15              | 26                  |
| GO:0006355 | 23              | 8                   | 22              | 26                  | 33              | 7                   |
| GO:0003676 | 11              | 8                   | 1               | 6                   | 4               | 7                   |
| GO:0016021 | 151             | 249                 | 129             | 32                  | 20              | 39                  |
| GO:0005524 | 9               | 14                  | 2               | 6                   | 15              | 1                   |
| GO:0007186 | 149             | 244                 | 125             | 27                  | 16              | 39                  |
| GO:0003735 | 0               | 9                   | 33              | 40                  | 62              | 26                  |
| GO:0006123 | 1               | 0                   | 2               | 2                   | 1               | 1                   |
| GO:0005840 | 0               | 9                   | 33              | 38                  | 54              | 25                  |
| GO:0006412 | 0               | 9                   | 33              | 40                  | 62              | 26                  |
| GO:0005126 | 24              | 12                  | 6               | 0                   | 5               | 2                   |
| GO:0006952 | 24              | 12                  | 6               | 0                   | 5               | 2                   |
| GO:0005200 | 6               | 7                   | 7               | 8                   | 4               | 0                   |
| GO:0016459 | 9               | 6                   | 2               | 5                   | 9               | 0                   |
| GO:0051015 | 9               | 6                   | 2               | 5                   | 7               | 0                   |
| GO:0007017 | 6               | 7                   | 8               | 8                   | 4               | 0                   |
| GO:0016491 | 2               | 0                   | 14              | 3                   | 1               | 6                   |
| GO:0004252 | 2               | 2                   | 2               | 1                   | 2               | 0                   |
| GO:0005751 | 1               | 0                   | 2               | 2                   | 1               | 1                   |
| GO:0000786 | 22              | 26                  | 18              | 29                  | 34              | 0                   |
| GO:0003774 | 9               | 6                   | 2               | 5                   | 9               | 0                   |
| GO:0003677 | 24              | 31                  | 19              | 29                  | 35              | 0                   |
| GO:0005874 | 6               | 7                   | 7               | 8                   | 4               | 0                   |
| GO:0045095 | 5               | 20                  | 7               | 7                   | 4               | 0                   |
| GO:0005576 | 26              | 17                  | 20              | 0                   | 5               | 3                   |
| GO:0003723 | 9               | 12                  | 0               | 5                   | 5               | 8                   |
| GO:0003824 | 0               | 4                   | 4               | 1                   | 1               | 4                   |
| GO:0005506 | 1               | 12                  | 7               | 1                   | 7               | 0                   |
| GO:0005739 | 1               | 1                   | 1               | 2                   | 3               | 0                   |
| GO:0046982 | 23              | 32                  | 19              | 29                  | 36              | 0                   |
| GO:0003924 | 6               | 7                   | 8               | 10                  | 9               | 0                   |
| GO:0006508 | 4               | 2                   | 2               | 1                   | 2               | 0                   |
